# Supplementary material for: Multi‐omics identify xanthine as a pro‐survival metabolite for nematodes with mitochondrial dysfunction
Source: PubMed Central journal article supplement (PMC6418696; doi:10.15252/embj.201899558), 2019-02-22
Supplement: EMBJ-38-e99558-s001.pdf [file EMBJ-38-e99558-s001.pdf]

## **TABLE OF CONTENTS**

- **Appendix Figures**

- Appendix Figure S1
- Appendix Figure S2
- Appendix Figure S3
- Appendix Figure S4

- **Appendix Figure Legends**

A

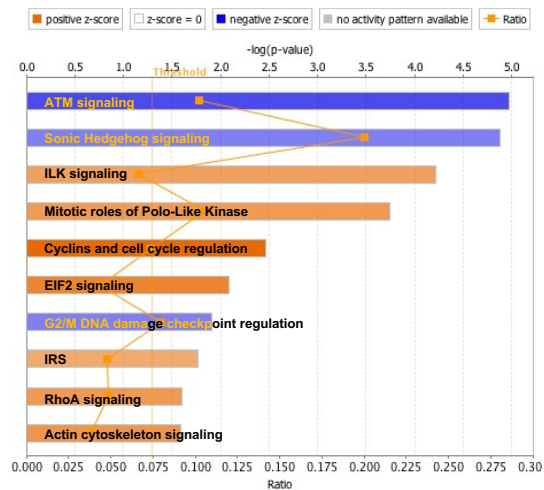

B

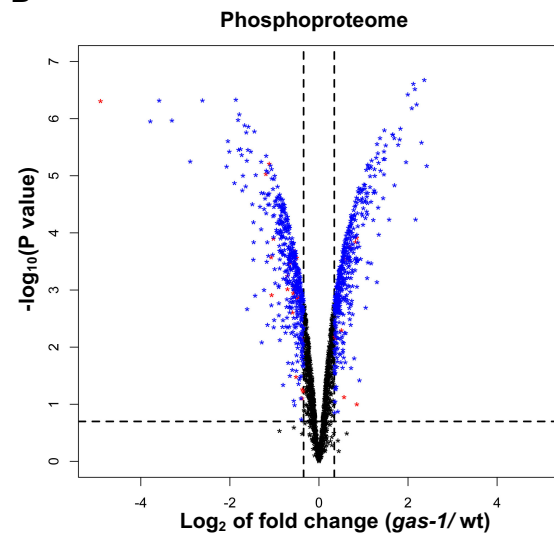

C

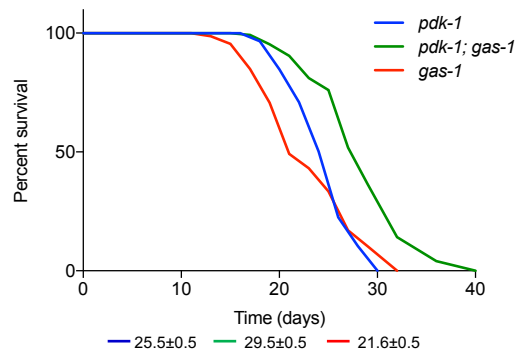

D

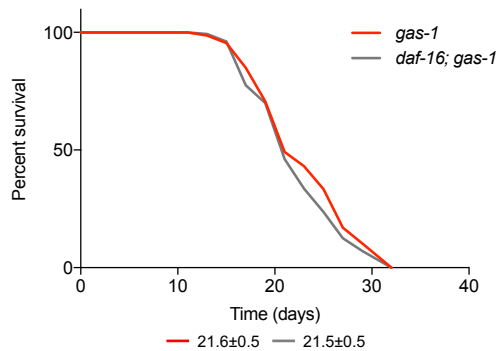

E

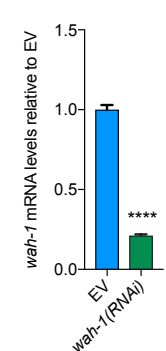

F

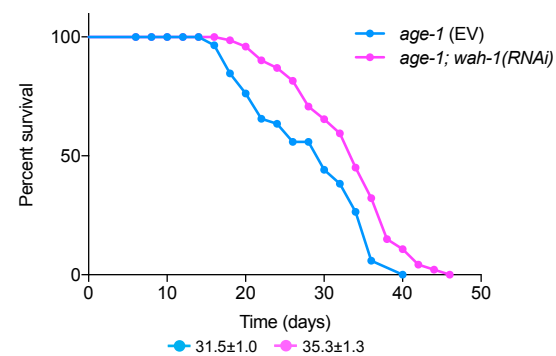

G

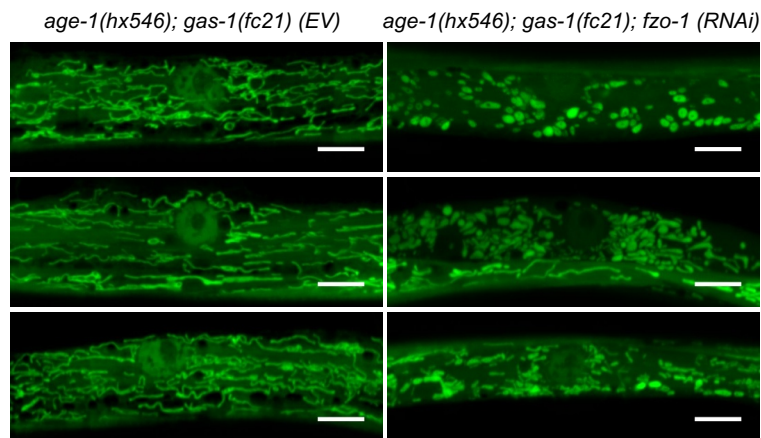

H

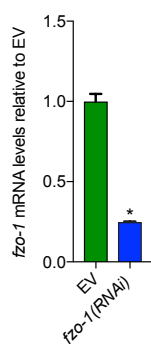

I

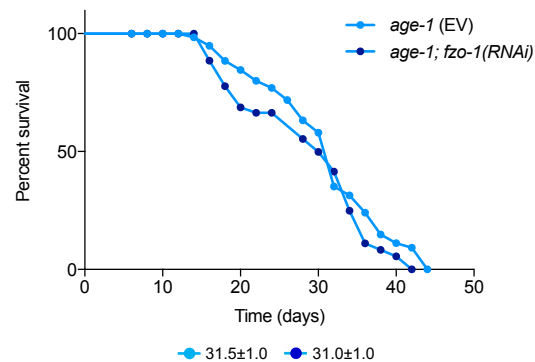

A

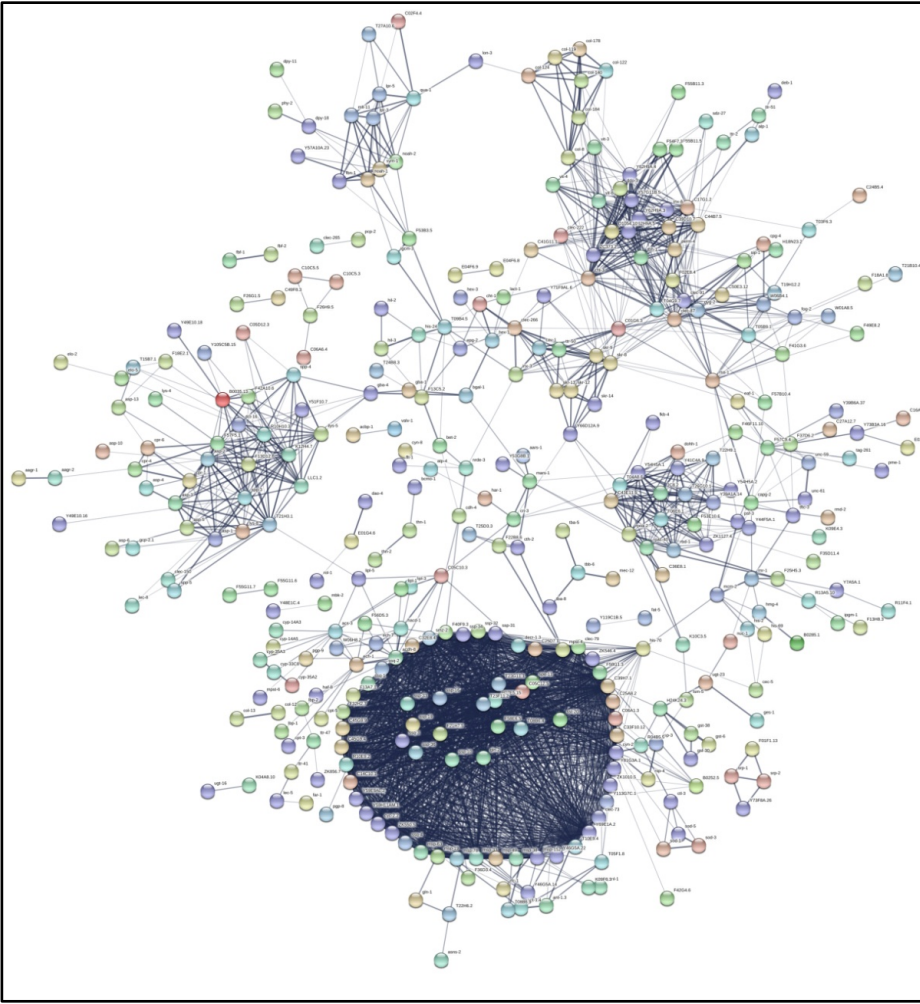

B

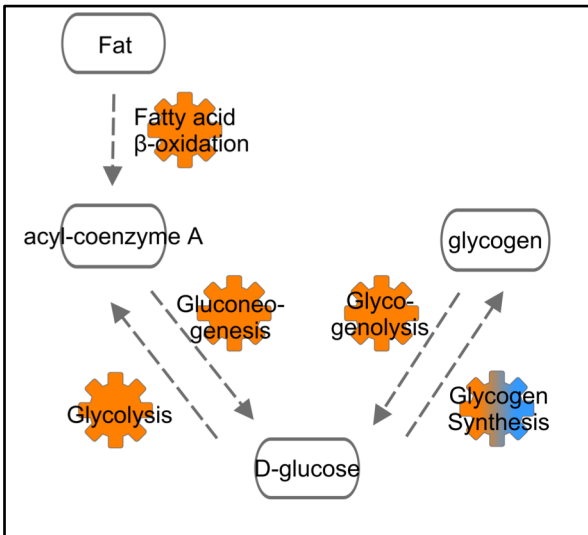

C

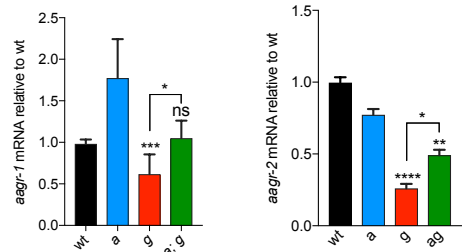

D

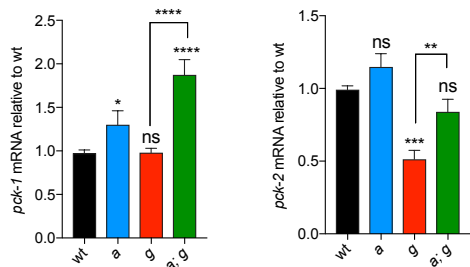

**A**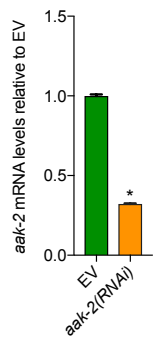**B**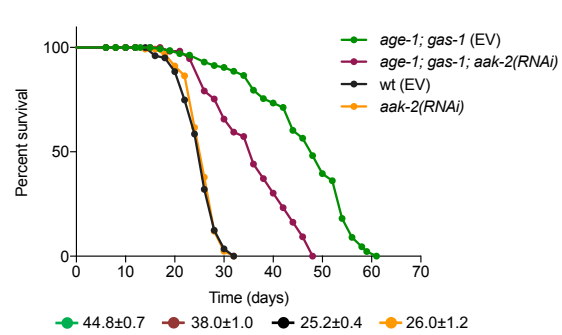**C**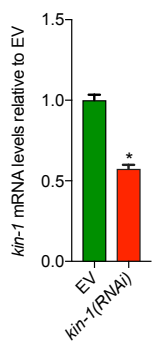**D**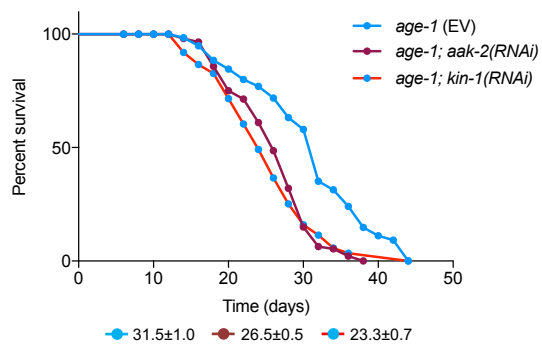

**A**

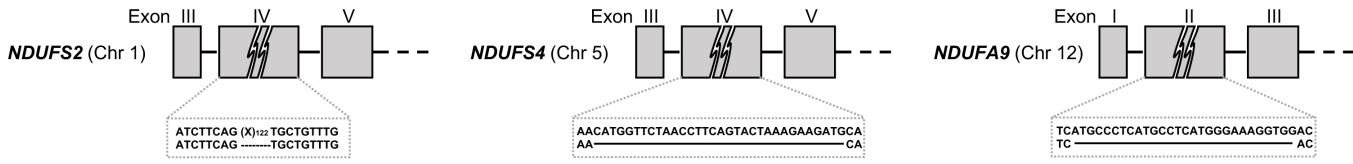

**B**

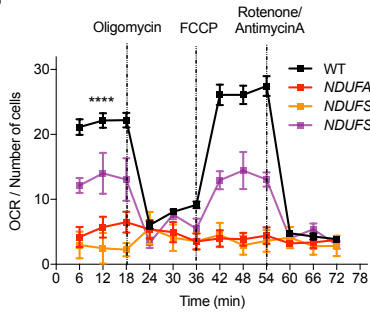

**C**

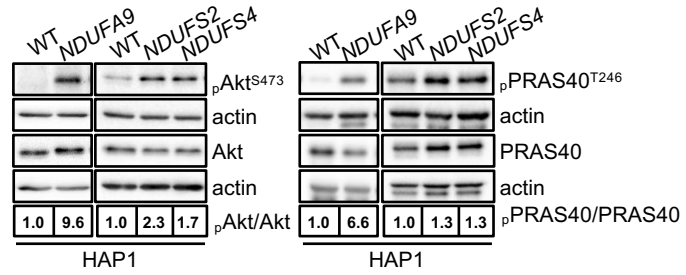

**D**

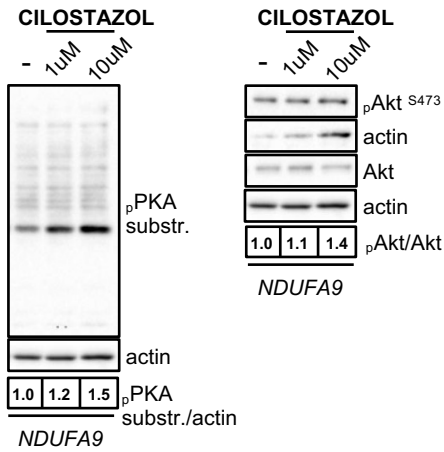

**E**

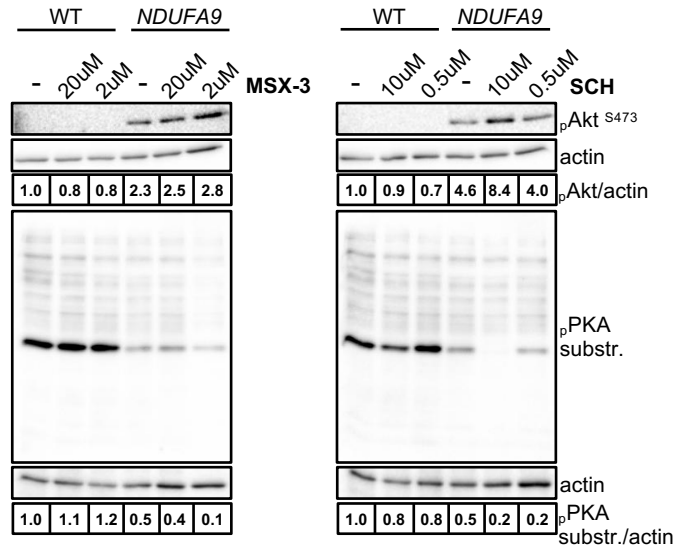

**F**

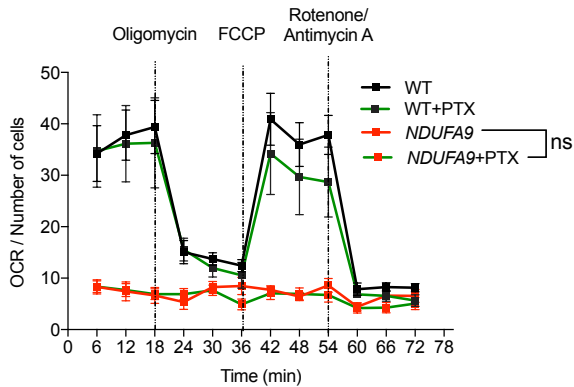

## APPENDIX FIGURE LEGENDS

### Appendix Figure S1. IIS inhibition is beneficial to nematodes carrying mitochondrial lesions (related to Figure 1).

(A) Overrepresented canonical pathways in phosphoproteomic analysis in *gas-1* compared to wt as calculated by IPA (FDR<20%, |z-score| >1).

(B) Volcano plot of differentially phosphorylated proteins in *gas-1(fc21)* mutants compared to wt. Cutoffs: 20% FDR,  $|\log_2(\text{fold change})| > 0.345$ . In red: proteins significantly differentially phosphorylated. In blue: significantly differentially phosphorylated proteins that reverted to wt levels in *age-1; gas-1* compared to *gas-1* mutants.

(C) Representative lifespan curve of *pdk-1*, *gas-1* and *pdk-1; gas-1* mutants.

(D) Representative lifespan analysis of *gas-1* and *daf-16; gas-1*.

(E) qRT-PCR of *wah-1* in *age-1* mutants grown on bacteria carrying an empty vector (EV) or expressing *wah-1* RNAi (normalized to EV, n=3). Error bars: mean  $\pm$  SEM, \*\*\*\**p* value < 0.0001, unpaired *t* test.

(F) Representative lifespan analysis of *age-1* mutants fed with empty vector (EV) or *wah-1* RNAi.

(G) Confocal images of representative mitochondrial morphology in muscle cells of L4 *age-1; gas-1* mutant worms grown on EV bacteria or expressing *fzo-1*. Scale bar: 5  $\mu\text{m}$ .

(H) qRT-PCR of *fzo-1* in worms fed with empty vector (EV) or *fzo-1* RNAi to indicate downregulation efficiency. Error bars: mean  $\pm$  SEM, n=3, \**p* value < 0.05, Mann Whitney U test.

(I) Representative lifespan of *age-1* mutants fed with empty vector (EV) and *fzo-1* RNAi.

Data information: For all lifespan curves (C, D, F, I) average median lifespans  $\pm$  SEM from all replicates (*gas-1* n=8; *pdk-1* n=2; *pdk-1; gas-1* n=2; *daf-16; gas-1* n=2; *age-1* (EV) n=4; *age-1* (*wah-1* RNAi) n=3; *age-1* (*fzo-1* RNAi) n=2) indicated beneath representative curves.

### Appendix Figure S2. *age-1; gas-1* mutant animals have dynamic carbohydrate metabolism (related to Figure 2).

A) STRING analysis of differentially expressed proteins from TMT/iTRAQ scan (20% FDR,  $|\log_2(\text{fold change})| > 0.47$ ) Thickness of lines correlated to level of confidence of interaction.

(B) IPA prediction of glucose metabolism in *age-1; gas-1* versus *gas-1* mutants. In orange, pathways that are predicted to be upregulated, while double colors indicate processes where different pathways give different predictions within the same dataset.

(C, D) qRT-PCR of (C) *aagr-1* and *aagr-2* (normalized to wt) and of (D) *pck-1* and *pck-2* (normalized to wt). Error bars: mean  $\pm$  SEM, n=6. \*\*\*\**p* value < 0.0001, \*\*\**p* value < 0.001, \*\**p* value < 0.01, \**p* value < 0.05, ns= non-significant, Kruskal-Wallis with Dunn's post hoc test. wt= wild type, a= *age-1*, g= *gas-1*, a; g= *age-1; gas-1*.

### **Appendix Figure S3. AMPK and PKA are required for the lifespan extension of *age-1; gas-1* mutant animals (related to Figure 3).**

(A) qRT-PCR of *aak-2* in *age-1; gas-1* mutants grown on bacteria carrying an empty vector (EV) or expressing *aak-2* RNAi (normalized to EV). Error bars: mean  $\pm$  SEM, n=3, \**p* value < 0.05, Mann Whitney U test.

(B) Representative lifespan analysis of wt and *age-1; gas-1* mutant worms fed with empty vector (EV) or *aak-2* RNAi.

(C) qRT-PCR of *kin-1* in *age-1; gas-1* nematodes fed with empty vector (EV) or *kin-1* RNAi. Error bars: mean  $\pm$  SEM, n=3, \**p* value < 0.05, Mann Whitney U test.

(D) Representative lifespan analysis of *age-1* mutants fed with empty vector (EV), *aak-2* and *kin-1* RNAi.

Data information: For all lifespans (B and D) average median lifespans  $\pm$  SEM from all replicates (wt (EV) n=4; wt (*aak-2* RNAi) n=3; *age-1; gas-1* (EV) n=6; *age-1; gas-1* (*aak-2* RNAi) n=3) indicated beneath representative curves.

### **Appendix Figure S4. Complex I deficient HAP1 cells display hyperactive IIS (related to Figure 4).**

(A) Schematic representation of the genetic deletions within the *NDUFS2*, *NDUFS4* and *NDUFA9* genes. The indicated loci were deleted using the CRISPR/Cas9 method. DNA sequencing confirmed the deletions in the corresponding loci.

(B) OCR in HAP1 cells lacking complex I subunit *NDUFA9*, *NDUFS4* or *NDUFS2* (normalized to no. cells/well). Error bars: mean  $\pm$  SEM; n=9. Curves show one

representative experiment. \*\*\*\* $p$  value < 0.0001 (basal respiration compared to WT); one-way ANOVA, Dunnett's post-hoc correction.

(C) Immunoblot analyses of phospho-Akt (S473), pan Akt, phospho-PRAS40 (T246) and total PRAS40 in WT and complex I deficient HAP1 cells. Numbers represent band densitometries across 2-3 biological replicates.

(D) Western blot analysis of PKA phospho-substrates in *NDUFA9* KO HAP1 cells after treatment with the PDE inhibitor cilostazol for 4 h (actin loading control). For (D) and (E), numbers represent band densitometries of the representative immunoblots.

(E) Immunoblot analysis of WT and *NDUFA9* KO HAP1 cells after treatment with the adenosine receptor antagonists MSX-3 and SCH58261 (SCH) for 4 h (actin loading control).

(F) Oxygen consumption rate (OCR) in WT and *NDUFA9* KO HAP1 cells, following 24 h treatment with vehicle (DMSO) or PTX (normalized to no. cells/well). One representative curve shown, mean  $\pm$  SEM,  $n=5$ , ns= non-significant, Mann Whitney U test.
