# Supplementary material for: Multi‐omics identify xanthine as a pro‐survival metabolite for nematodes with mitochondrial dysfunction
Source: PubMed Central journal article supplement (PMC6418696; doi:10.15252/embj.201899558), 2019-02-22

### Figure 4F

$\alpha$ -pAKT<sub>Ser473</sub>

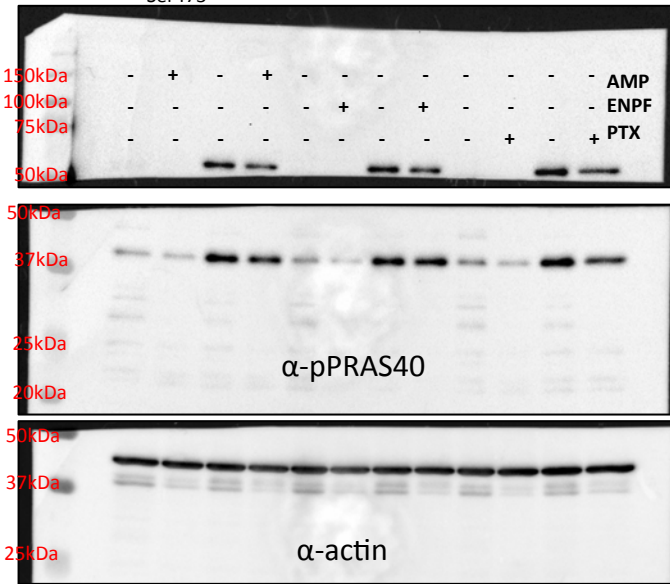

$\alpha$ -AKT

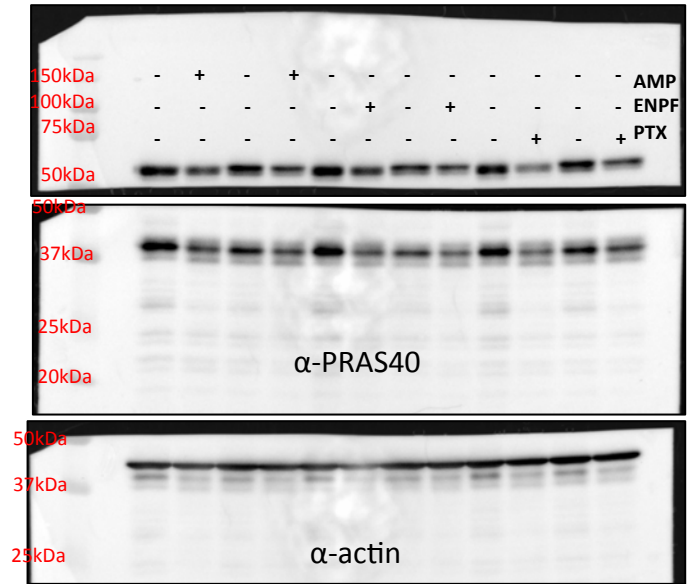

### Figure 4G

$\alpha$ -pPKA substrates

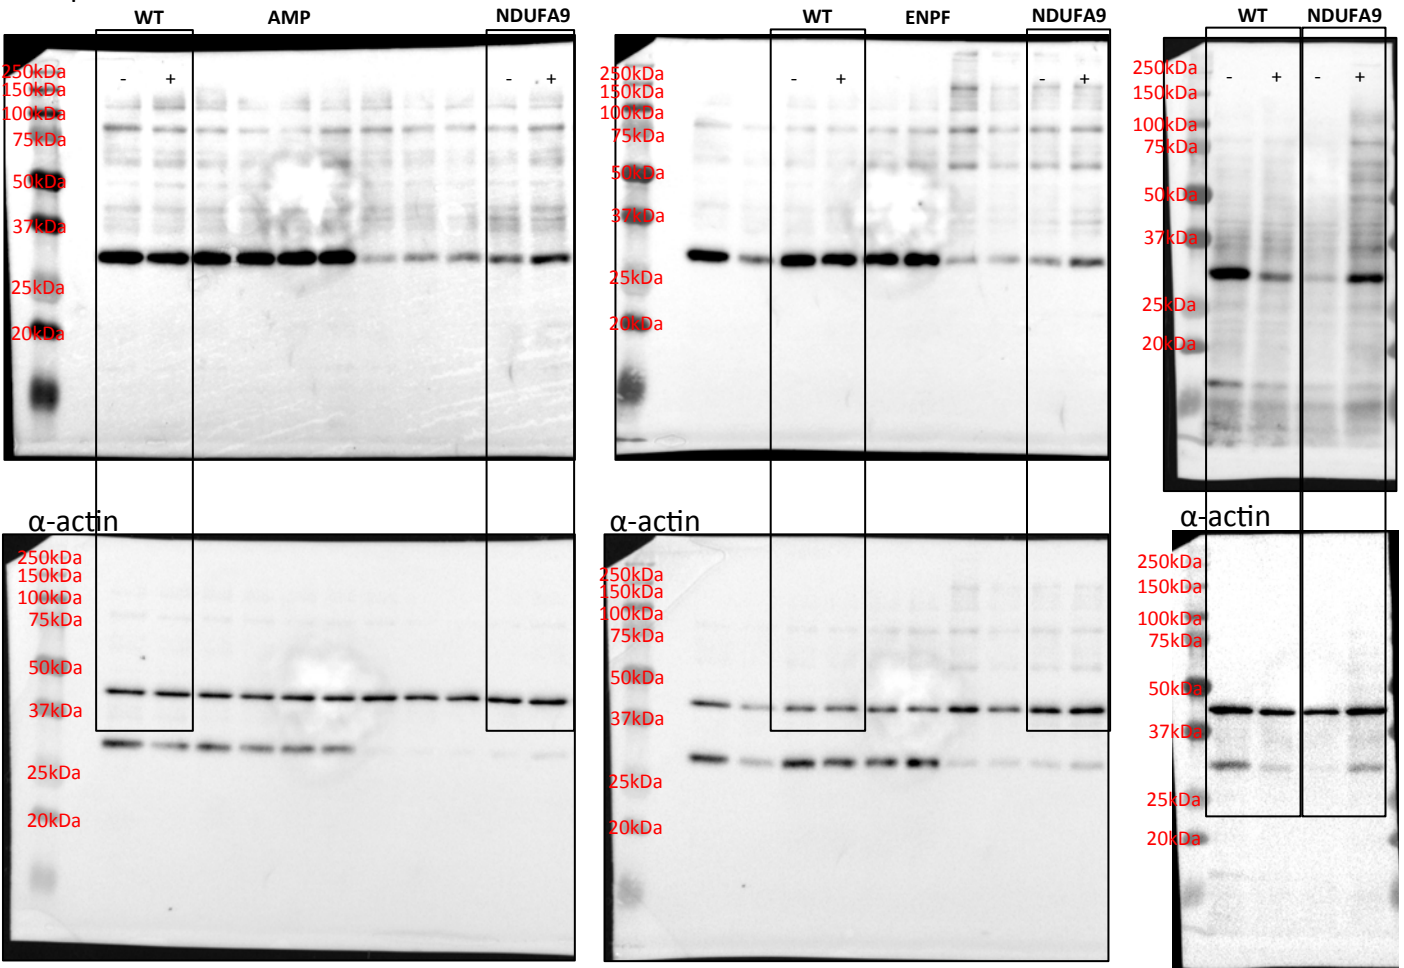

Supplement: EMBJ-38-e99558-s005.pdf [file EMBJ-38-e99558-s005.pdf]
