# Supplementary material for: Multi‐omics identify xanthine as a pro‐survival metabolite for nematodes with mitochondrial dysfunction
Source: PubMed Central journal article supplement (PMC6418696; doi:10.15252/embj.201899558), 2019-02-22

# Figure 5E

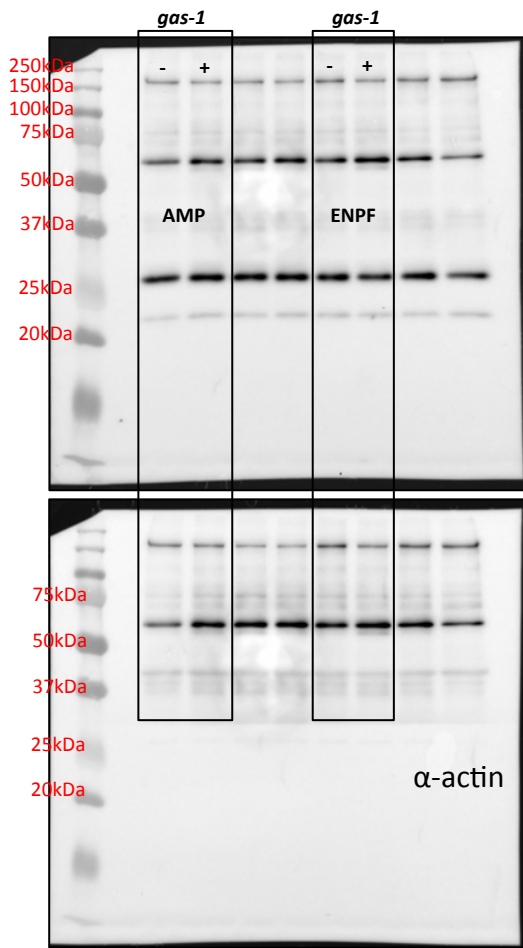

# $\alpha$ -pKIN-1 substrates

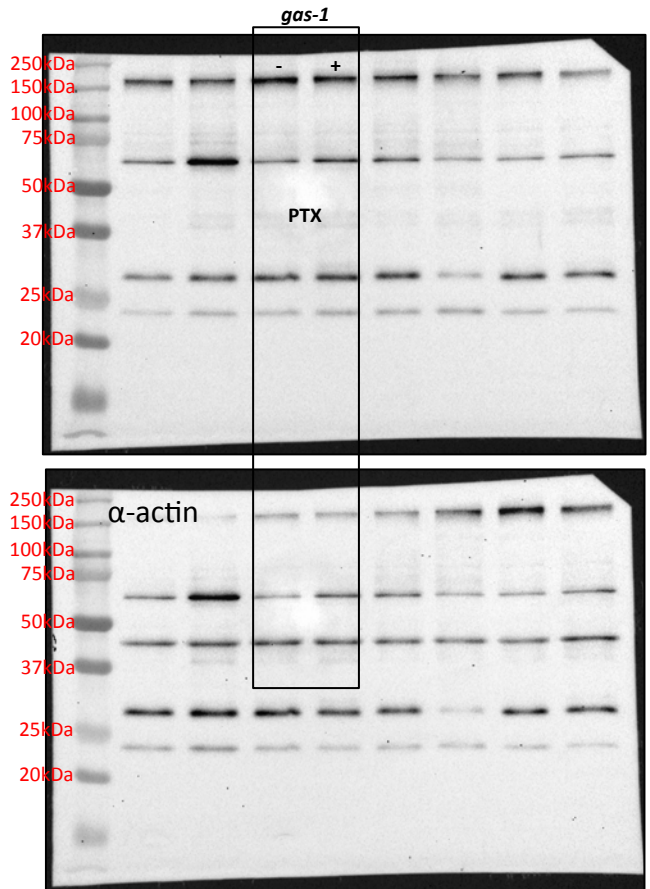

# Figure 5F

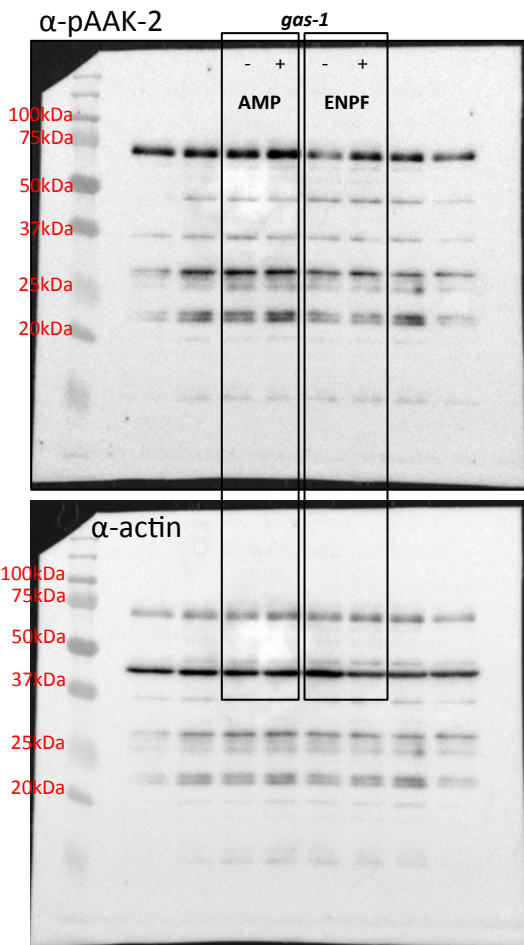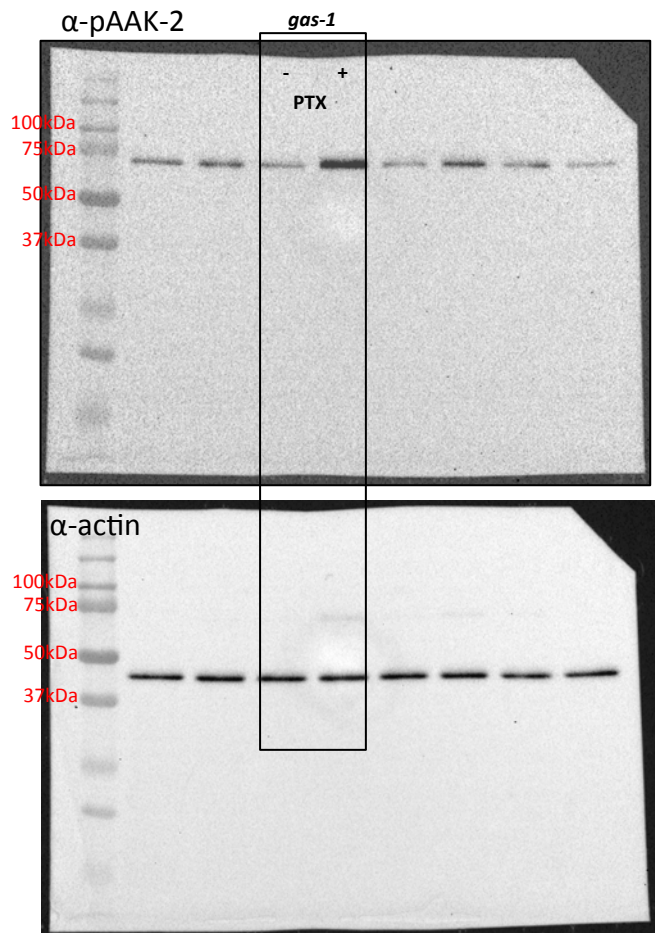

Supplement: EMBJ-38-e99558-s006.pdf [file EMBJ-38-e99558-s006.pdf]
