# Supplementary material for: Multi‐omics identify xanthine as a pro‐survival metabolite for nematodes with mitochondrial dysfunction
Source: PubMed Central journal article supplement (PMC6418696; doi:10.15252/embj.201899558), 2019-02-22

# Appendix Figure S4C

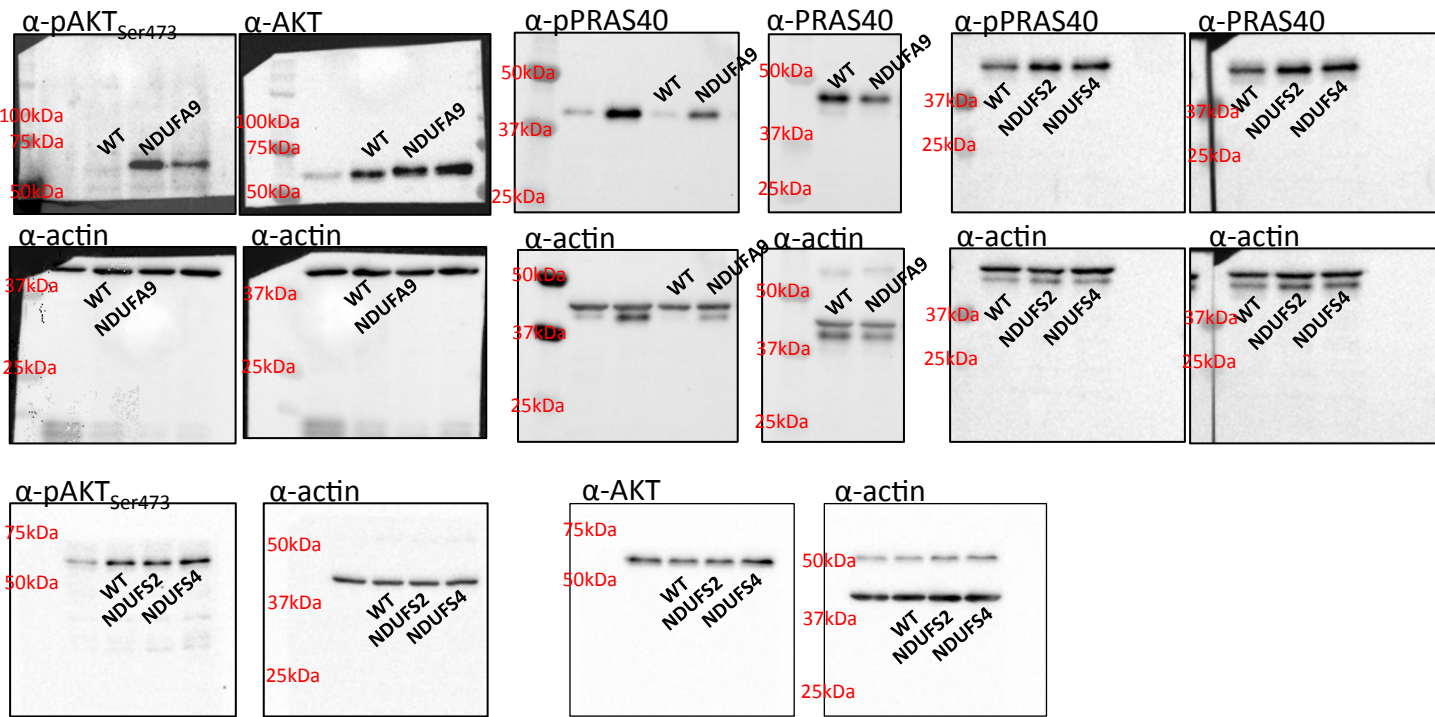

# Appendix Figure S4D

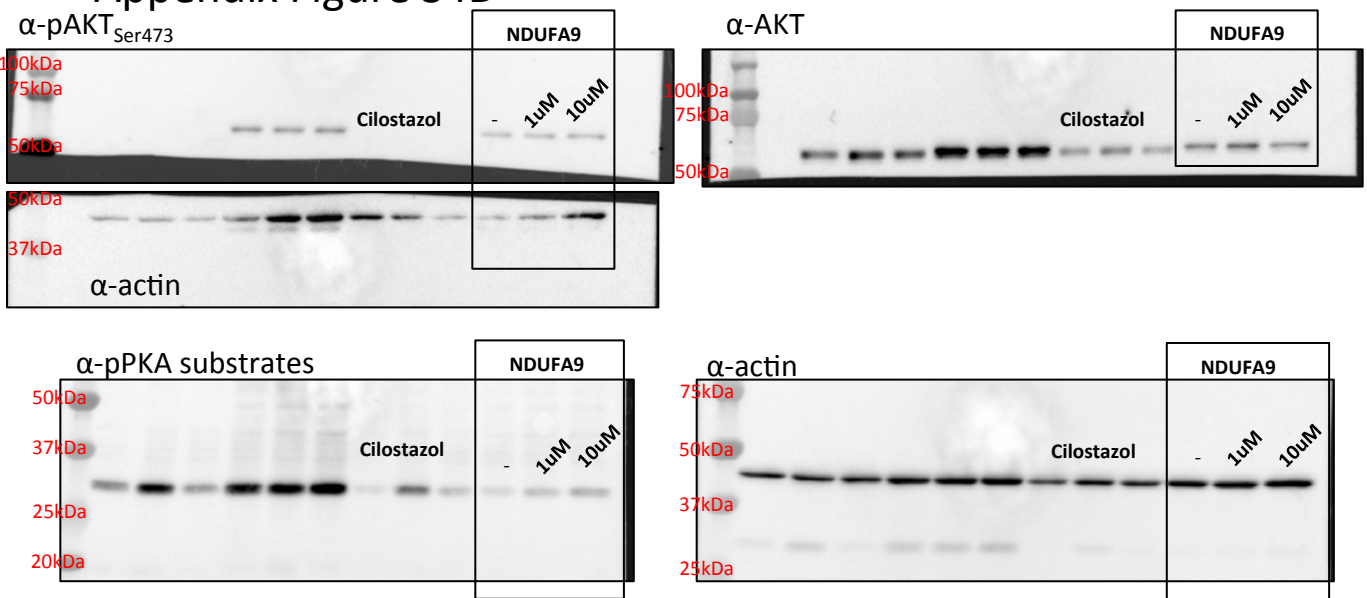

# Appendix Figure S4E

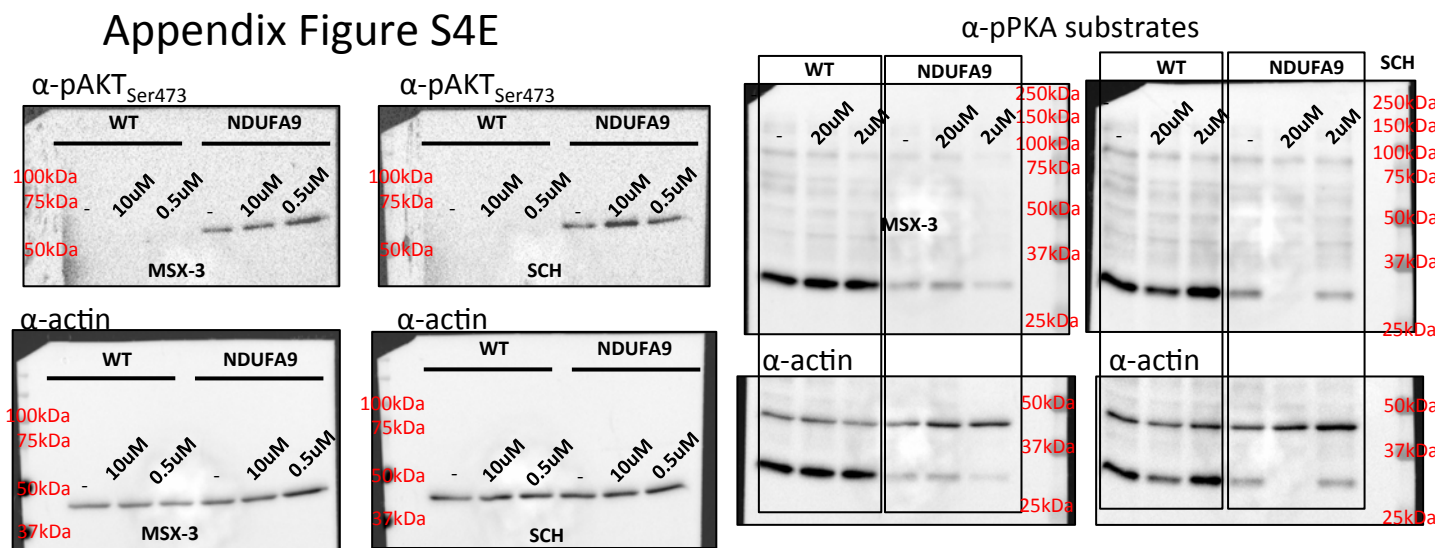

Supplement: EMBJ-38-e99558-s007.pdf [file EMBJ-38-e99558-s007.pdf]
